# Supplementary material for: Maternal Prenatal Infection and Anxiety Predict Neurodevelopmental Outcomes in Middle Childhood
Source: PubMed Central journal article supplement (PMC9069845; doi:10.1037/abn0000746), 2022-03-03

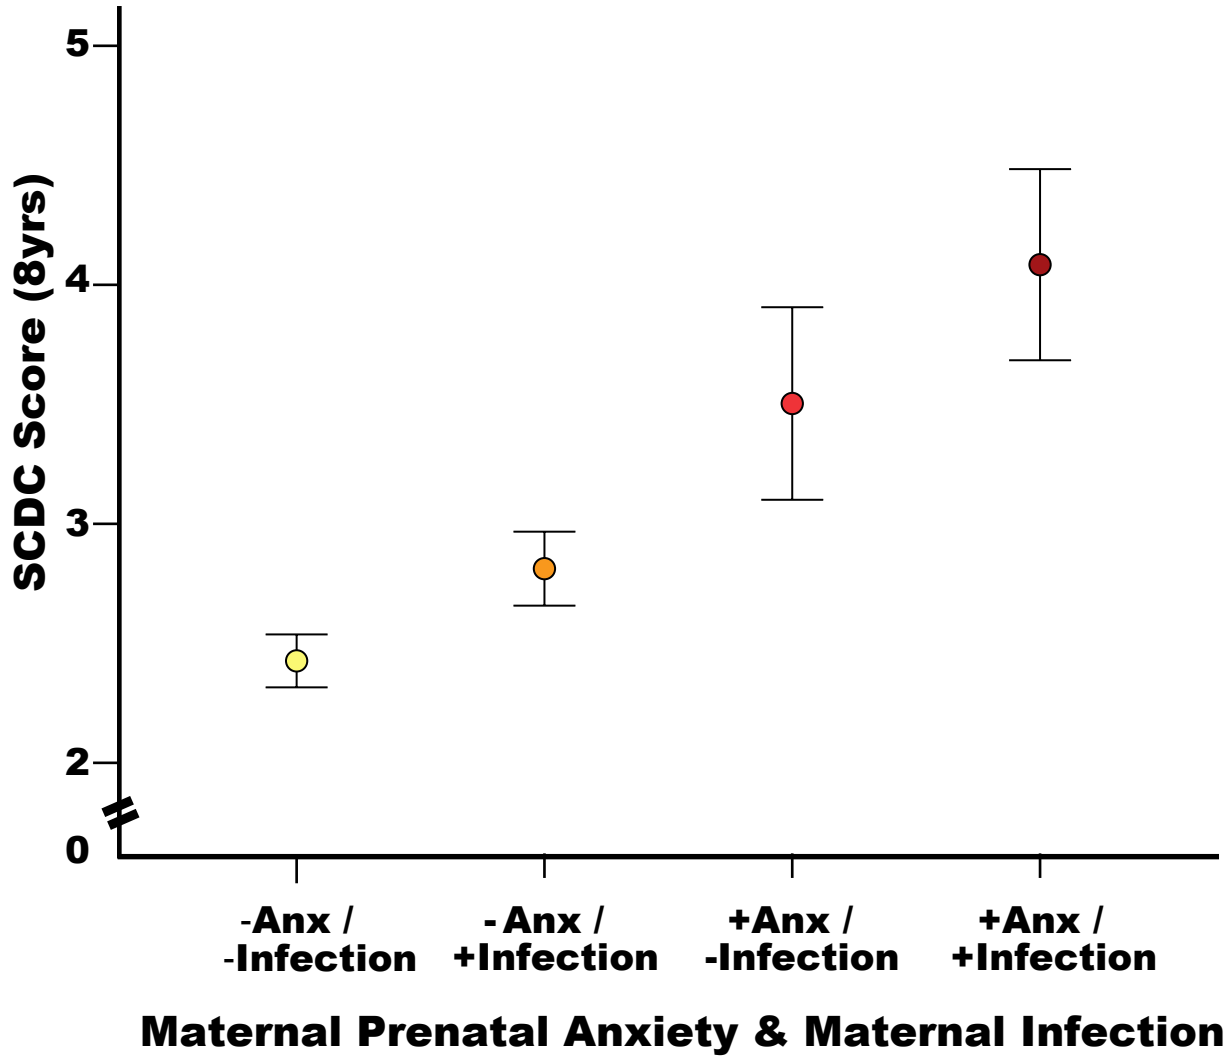

Supplement: ABN-2020-1947_Suppl2.pdf [file ABN-2020-1947_Suppl2.pdf]
